# Supplementary material for: Prognostic Potential of Secreted Modular Calcium-Binding Protein 1 in Low-Grade Glioma
Source: Front Mol Biosci. 2021 Nov 19;8:666623. doi: 10.3389/fmolb.2021.666623 (PMC8640086; doi:10.3389/fmolb.2021.666623)
Supplement: Supplementary file 1 [file Table2.XLSX]

## Sheet: SMOC1 Prognoscan
Supplementary Table 2 The prognostic value of SMOC1 in different type of tumors in PrognoScan database
DATASET	CANCER TYPE	SUBTYPE	ENDPOINT	COHORT	N	COX P-VALUE	ln(HR)	HR [95% CI-low CI-upp]
GSE4412-GPL97	Brain cancer	Glioma	Overall Survival	UCLA (1996-2003)	74	0.000141867	-0.592464	0.55 [0.41 - 0.75]
GSE4412-GPL97	Brain cancer	Glioma	Overall Survival	UCLA (1996-2003)	74	0.00106869	-0.281186	0.75 [0.64 - 0.89]
GSE14333	Colorectal cancer		Disease Free Survival	Melbourne	226	0.00834547	0.263706	1.30 [1.07 - 1.58]
GSE17537	Colorectal cancer		Overall Survival	VMC	55	0.0143359	1.39887	4.05 [1.32 - 12.41]
GSE14333	Colorectal cancer		Disease Free Survival	Melbourne	226	0.0147715	0.24837	1.28 [1.05 - 1.57]
GSE22138	Eye cancer	Uveal melanoma	Distant Metastasis Free Survival	BRCIC	63	0.0151028	-32.3066	0.00 [0.00 - 0.00]
GSE17536	Colorectal cancer		Disease Free Survival	MCC	145	0.0178348	0.631362	1.88 [1.12 - 3.17]
GSE9893	Breast cancer		Overall Survival	Montpellier, Bordeaux, Turin (1989-2001)	155	0.0308433	-0.56531	0.57 [0.34 - 0.95]
GSE17536	Colorectal cancer		Disease Free Survival	MCC	145	0.0374849	0.987085	2.68 [1.06 - 6.80]
GSE31210	Lung cancer	Adenocarcinoma	Overall Survival	NCCRI	204	0.0377567	0.36064	1.43 [1.02 - 2.02]
GSE1378	Breast cancer		Relapse Free Survival	MGH (1987-2000)	60	0.038728	0.282083	1.33 [1.01 - 1.73]
GSE17260	Ovarian cancer		Progression Free Survival	Niigata (1997-2008)	110	0.0400779	-0.513388	0.60 [0.37 - 0.98]
GSE9195	Breast cancer		Relapse Free Survival	GUYT2	77	0.0423734	1.23944	3.45 [1.04 - 11.43]
GSE4271-GPL97	Brain cancer	Astrocytoma	Overall Survival	MDA	77	0.05883	-0.193575	0.82 [0.67 - 1.01]
GSE17260	Ovarian cancer		Overall Survival	Niigata (1997-2008)	110	0.0629733	-0.63727	0.53 [0.27 - 1.04]
GSE17537	Colorectal cancer		Overall Survival	VMC	55	0.0642879	1.95626	7.07 [0.89 - 56.18]
GSE19234	Skin cancer	Melanoma	Overall Survival	NYU	38	0.0677778	-0.491002	0.61 [0.36 - 1.04]
GSE31210	Lung cancer	Adenocarcinoma	Relapse Free Survival	NCCRI	204	0.0751997	0.221044	1.25 [0.98 - 1.59]
GSE1379	Breast cancer		Relapse Free Survival	MGH (1987-2000)	60	0.0909621	0.246501	1.28 [0.96 - 1.70]
GSE12417-GPL570	Blood cancer	AML	Overall Survival	AMLCG (2004)	79	0.0911292	-1.10778	0.33 [0.09 - 1.19]
GSE16131-GPL97	Blood cancer	Follicular lymphoma	Overall Survival	NCI (1974-2001)	180	0.101021	-0.239042	0.79 [0.59 - 1.05]
GSE17537	Colorectal cancer		Disease Specific Survival	VMC	49	0.101287	1.26409	3.54 [0.78 - 16.06]
GSE9195	Breast cancer		Distant Metastasis Free Survival	GUYT2	77	0.10177	1.05199	2.86 [0.81 - 10.10]
GSE4271-GPL97	Brain cancer	Astrocytoma	Overall Survival	MDA	77	0.122225	-0.116194	0.89 [0.77 - 1.03]
GSE1456-GPL97	Breast cancer		Overall Survival	Stockholm (1994-1996)	159	0.151834	0.361384	1.44 [0.88 - 2.35]
GSE17537	Colorectal cancer		Disease Free Survival	VMC	55	0.156766	0.839347	2.31 [0.72 - 7.40]
GSE19615	Breast cancer		Distant Metastasis Free Survival	DF/HCC	115	0.159544	-0.956715	0.38 [0.10 - 1.46]
GSE17537	Colorectal cancer		Disease Free Survival	VMC	55	0.165427	1.52498	4.60 [0.53 - 39.64]
GSE17536	Colorectal cancer		Disease Specific Survival	MCC	177	0.168988	0.374271	1.45 [0.85 - 2.48]
GSE12276	Breast cancer		Relapse Free Survival	EMC	204	0.171994	0.0836438	1.09 [0.96 - 1.23]
GSE12417-GPL97	Blood cancer	AML	Overall Survival	AMLCG (1999-2003)	163	0.195099	-0.832845	0.43 [0.12 - 1.53]
GSE2658	Blood cancer	Multiple myeloma	Disease Specific Survival	Arkansas	559	0.201377	-0.134366	0.87 [0.71 - 1.07]
GSE17536	Colorectal cancer		Overall Survival	MCC	177	0.233105	0.312986	1.37 [0.82 - 2.29]
GSE9891	Ovarian cancer		Overall Survival	AOCS, RBH, WH, NKI-AVL (1992-2006)	278	0.23894	0.709431	2.03 [0.62 - 6.62]
GSE8841	Ovarian cancer		Overall Survival	Milan (1992-2003)	81	0.247856	0.929484	2.53 [0.52 - 12.26]
GSE4922-GPL97	Breast cancer		Disease Free Survival	Uppsala (1987-1989)	249	0.258016	-0.268573	0.76 [0.48 - 1.22]
GSE13507	Bladder cancer	Transitional cell carcinoma	Disease Specific Survival	CNUH	165	0.268887	1.07383	2.93 [0.44 - 19.64]
GSE1456-GPL97	Breast cancer		Relapse Free Survival	Stockholm (1994-1996)	159	0.367601	0.234433	1.26 [0.76 - 2.11]
GSE9195	Breast cancer		Relapse Free Survival	GUYT2	77	0.371395	0.549638	1.73 [0.52 - 5.78]
GSE12276	Breast cancer		Relapse Free Survival	EMC	204	0.400592	0.0492117	1.05 [0.94 - 1.18]
GSE4922-GPL97	Breast cancer		Disease Free Survival	Uppsala (1987-1989)	249	0.42394	-0.120807	0.89 [0.66 - 1.19]
GSE9195	Breast cancer		Distant Metastasis Free Survival	GUYT2	77	0.427064	0.485293	1.62 [0.49 - 5.38]
GSE1456-GPL97	Breast cancer		Disease Specific Survival	Stockholm (1994-1996)	159	0.428849	0.239509	1.27 [0.70 - 2.30]
GSE17537	Colorectal cancer		Disease Specific Survival	VMC	49	0.433397	1.16269	3.20 [0.17 - 58.65]
GSE7696	Brain cancer	Glioblastoma	Overall Survival	Lausanne	70	0.43818	-0.116068	0.89 [0.66 - 1.19]
GSE1456-GPL97	Breast cancer		Overall Survival	Stockholm (1994-1996)	159	0.441229	0.168226	1.18 [0.77 - 1.82]
GSE13507	Bladder cancer		Overall Survival	CNUH	165	0.466994	0.611408	1.84 [0.35 - 9.57]
GSE17260	Ovarian cancer		Progression Free Survival	Niigata (1997-2008)	110	0.488567	-0.0784087	0.92 [0.74 - 1.15]
GSE3141	Lung cancer	NSCLC	Overall Survival	Duke	111	0.497926	0.0864162	1.09 [0.85 - 1.40]
GSE17710	Lung cancer	Squamous cell carcinoma	Overall Survival	UNC	56	0.499006	-0.22245	0.80 [0.42 - 1.53]
GSE19615	Breast cancer		Distant Metastasis Free Survival	DF/HCC	115	0.5271	-0.155019	0.86 [0.53 - 1.38]
GSE7696	Brain cancer	Glioblastoma	Overall Survival	Lausanne	70	0.574522	-0.13912	0.87 [0.54 - 1.41]
GSE13213	Lung cancer	Adenocarcinoma	Overall Survival	Nagoya (1995-1999, 2002-2004)	117	0.583903	-0.0453801	0.96 [0.81 - 1.12]
GSE2837	Head and neck cancer	Squamous cell carcinoma	Relapse Free Survival	VUMC, VAMC, UTMDACC (1992-2005)	28	0.592005	-1.08294	0.34 [0.01 - 17.77]
GSE22138	Eye cancer	Uveal melanoma	Distant Metastasis Free Survival	BRCIC	63	0.592559	-0.395512	0.67 [0.16 - 2.87]
GSE16581	Brain cancer	Meningioma	Overall Survival	UCLA	67	0.60912	-0.303931	0.74 [0.23 - 2.37]
GSE3494-GPL97	Breast cancer		Disease Specific Survival	Uppsala (1987-1989)	236	0.63772	-0.14213	0.87 [0.48 - 1.57]
GSE13213	Lung cancer	Adenocarcinoma	Overall Survival	Nagoya (1995-1999, 2002-2004)	117	0.641461	-0.0549734	0.95 [0.75 - 1.19]
GSE17260	Ovarian cancer		Overall Survival	Niigata (1997-2008)	110	0.654369	-0.0671202	0.94 [0.70 - 1.25]
GSE17536	Colorectal cancer		Overall Survival	MCC	177	0.655378	-0.225797	0.80 [0.30 - 2.15]
GSE12417-GPL97	Blood cancer	AML	Overall Survival	AMLCG (1999-2003)	163	0.683603	0.36089	1.43 [0.25 - 8.14]
GSE6532-GPL570	Breast cancer		Relapse Free Survival	GUYT	87	0.703589	0.128179	1.14 [0.59 - 2.20]
GSE6532-GPL570	Breast cancer		Distant Metastasis Free Survival	GUYT	87	0.703589	0.128179	1.14 [0.59 - 2.20]
GSE12417-GPL570	Blood cancer	AML	Overall Survival	AMLCG (2004)	79	0.707885	0.292741	1.34 [0.29 - 6.20]
GSE6532-GPL570	Breast cancer		Relapse Free Survival	GUYT	87	0.717397	0.159069	1.17 [0.50 - 2.77]
GSE6532-GPL570	Breast cancer		Distant Metastasis Free Survival	GUYT	87	0.717397	0.159069	1.17 [0.50 - 2.77]
GSE31210	Lung cancer	Adenocarcinoma	Overall Survival	NCCRI	204	0.717736	0.0767992	1.08 [0.71 - 1.64]
GSE16581	Brain cancer	Meningioma	Overall Survival	UCLA	67	0.7328	-0.154192	0.86 [0.35 - 2.08]
GSE8894	Lung cancer	NSCLC	Relapse Free Survival	Seoul (1995-2005)	138	0.7503	-0.0609763	0.94 [0.65 - 1.37]
GSE17710	Lung cancer	Squamous cell carcinoma	Relapse Free Survival	UNC	56	0.751225	-0.056809	0.94 [0.66 - 1.34]
GSE3141	Lung cancer	NSCLC	Overall Survival	Duke	111	0.788784	0.0395266	1.04 [0.78 - 1.39]
GSE19234	Skin cancer	Melanoma	Overall Survival	NYU	38	0.807666	-0.0951726	0.91 [0.42 - 1.96]
GSE1456-GPL97	Breast cancer		Disease Specific Survival	Stockholm (1994-1996)	159	0.808459	0.0665731	1.07 [0.62 - 1.83]
GSE17710	Lung cancer	Squamous cell carcinoma	Relapse Free Survival	UNC	56	0.81813	-0.0664692	0.94 [0.53 - 1.65]
GSE17710	Lung cancer	Squamous cell carcinoma	Overall Survival	UNC	56	0.822025	-0.0428145	0.96 [0.66 - 1.39]
GSE2658	Blood cancer	Multiple myeloma	Disease Specific Survival	Arkansas	559	0.828443	-0.0244693	0.98 [0.78 - 1.22]
GSE1456-GPL97	Breast cancer		Relapse Free Survival	Stockholm (1994-1996)	159	0.873175	0.0380862	1.04 [0.65 - 1.66]
GSE8894	Lung cancer	NSCLC	Relapse Free Survival	Seoul (1995-2005)	138	0.918915	-0.0134866	0.99 [0.76 - 1.28]
GSE31210	Lung cancer	Adenocarcinoma	Relapse Free Survival	NCCRI	204	0.938145	-0.0125082	0.99 [0.72 - 1.35]
GSE9891	Ovarian cancer		Overall Survival	AOCS, RBH, WH, NKI-AVL (1992-2006)	278	0.941836	-0.0266946	0.97 [0.48 - 1.99]
GSE17710	Lung cancer	Squamous cell carcinoma	Relapse Free Survival	UNC	56	0.944521	0.013806	1.01 [0.69 - 1.50]
GSE17536	Colorectal cancer		Disease Specific Survival	MCC	177	0.952329	-0.0326601	0.97 [0.33 - 2.82]
GSE16131-GPL97	Blood cancer	Follicular lymphoma	Overall Survival	NCI (1974-2001)	180	0.959757	0.00709715	1.01 [0.76 - 1.33]
GSE3494-GPL97	Breast cancer		Disease Specific Survival	Uppsala (1987-1989)	236	0.97254	0.00645571	1.01 [0.70 - 1.45]
GSE17710	Lung cancer	Squamous cell carcinoma	Overall Survival	UNC	56	0.976012	-0.00673158	0.99 [0.64 - 1.54]
GSE2837	Head and neck cancer	Squamous cell carcinoma	Relapse Free Survival	VUMC, VAMC, UTMDACC (1992-2005)	28	0.999881	0.000133794	1.00 [0.17 - 5.76]
